# Supplementary material
Source: PubMed Central journal article supplement (PMC5649550)
Supplement: blood769620-suppl1.pdf [file blood769620-suppl1.pdf]

**SUPPLEMENTAL MATERIALS**

**Supplemental Figure 1.** Overall survival from commencement of salvage therapy by tumor response and transplantation status (Kaplan-Meier). CR, complete response; PR, partial response.

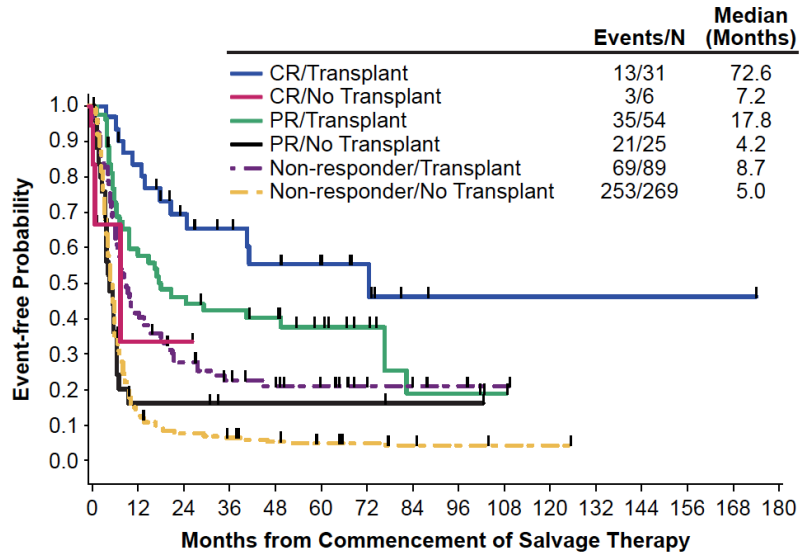

**Supplemental Figure 2.** Overall survival from commencement of salvage therapy by A) ECOG performance status B) disease stage, and C) IPI risk classification. IPI, International Prognostic Index.

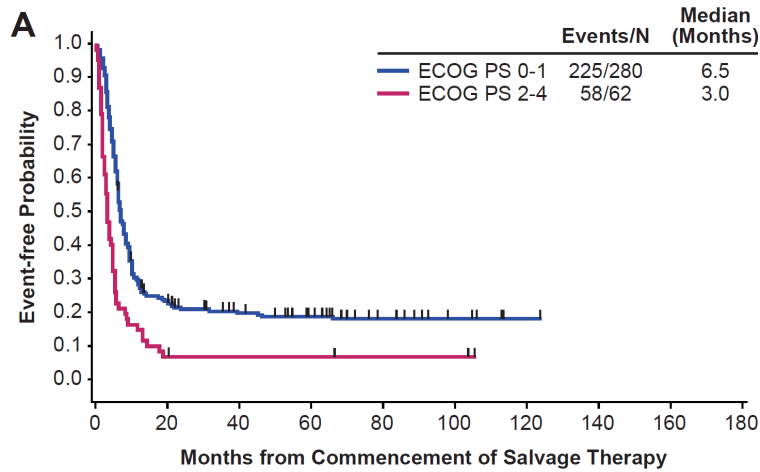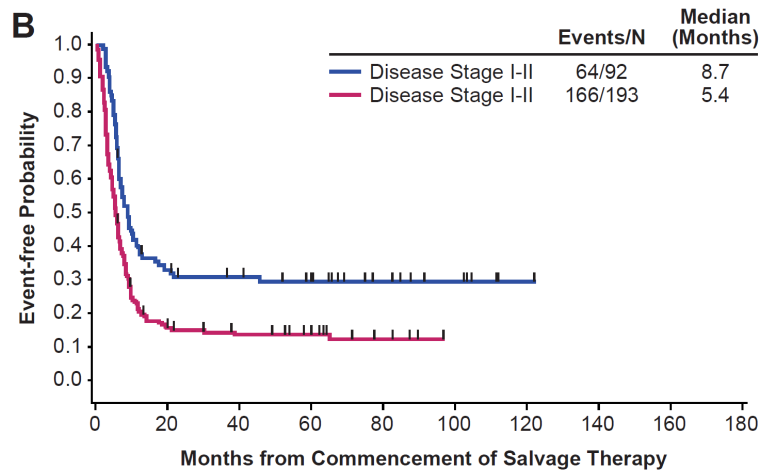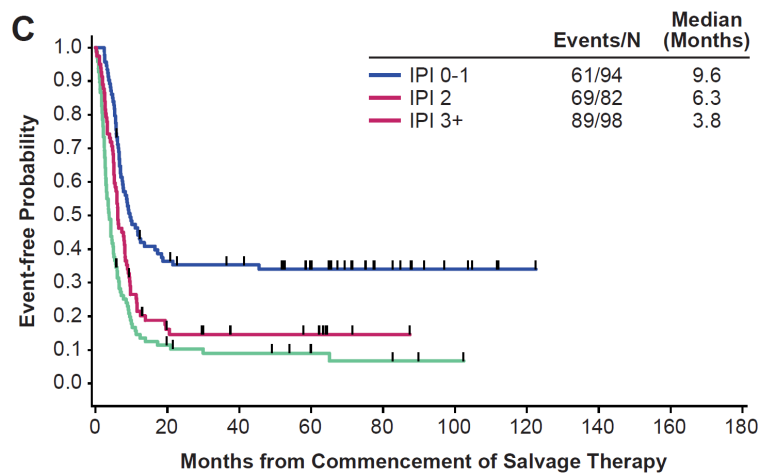

**Supplemental Table 1**

|                       | <b>Overall Cohort, N</b> | <b>Enrollment Years</b> | <b>Point of Ascertainment</b> | <b>Prescribed Assessments After Refractory?</b> | <b>Central Radiology Review of Response?</b> |
|-----------------------|--------------------------|-------------------------|-------------------------------|-------------------------------------------------|----------------------------------------------|
| <b>LY.12 (CCTG)</b>   | 619                      | 2003-2011               | First relapse/refractory      | Yes (clinical)                                  | No                                           |
| <b>CORAL (LYSARC)</b> | 477                      | 2003-2008               | First relapse/refractory      | Yes<br>Amendment was made                       | No<br>Only investigator assessment           |
| <b>MDACC</b>          | 886                      | 2001-2014               | First relapse                 | No                                              | No                                           |
| <b>IA/MC</b>          | 1039                     | 2002-2012               | Newly diagnosed               | No                                              | No                                           |

CCTG, Canadian Cancer Trials Group; CORAL, Collaborative Trial in Relapsed Aggressive Lymphoma; IA/MC, University of Iowa Mayo Clinic Lymphoma Specialized Program of Research Excellence; LYSARC, Lymphoma Academic Research Organization; MDACC, MD Anderson Cancer Center.
